# Supplementary material
Source: MDPI journal article supplement (https://www.mdpi.com/2674-0583/2/2/8)
Supplement: s1 [file s1]

## *Saccharomyces cerevisiae* as a host for chondroitin production

Márcia R. Couto, Joana L. Rodrigues, Oscar Dias and Lígia R. Rodrigues

**Table S1.** Primers used in this study.

| Purpose                                    | Name             | Template             | Sequence (5' → 3')                                            | Restriction enzyme |
|--------------------------------------------|------------------|----------------------|---------------------------------------------------------------|--------------------|
| Cloning of <i>Giuae</i> in pSP-GM1 (PGK1)  | Gi_uae_Fw1       | pUC57_Giuae          | AAAGGATCCAAAAAATGCATCACCATCAC<br>CATCACCAGAATCATTCTTCTTGG     | <i>Bam</i> HI      |
|                                            | Gi_uae_Rv1       |                      | AAAAC TCGAGCTATAATCCAATACCTTTTAC<br>ATC                       | <i>Xho</i> I       |
| Cloning of <i>Btchsy</i> in pSP-GM1 (PGK1) | Bt_chsy1_Fw      | pUC57_Btchsy1        | AAAGGATCCAAAAAATGCATCACCATCAC<br>CATCACGCTGTCCGAGGTCTGAAGAGC  | <i>Bam</i> HI      |
|                                            | Bt_chsy1_Rv      |                      | AAAAC TCGAGTTAAGCCGTGCGGACTGAGC                               | <i>Xho</i> I       |
| Cloning of <i>Giuae</i> in pSP-GM1_(PTEF)  | Giuae_tefp_Fw    | pSP-GM1_Giuae        | ATTTGCGGCCGCAAAACAATGCATCACCAT<br>CACCAT                      | <i>Not</i> I       |
|                                            | Giuae_tefp_Rv    |                      | AACGAGCTCCTATAATCCAATACCTTTTACA<br>TC                         | <i>Sac</i> I       |
| <i>Zmugd</i> cloning in pSP-GM1_tefp_Giuae | Zm_psp_Fw        | pSP-GM1_Zmugd        | AAAGGATCCAAAAAATGCATCACCATCAC<br>CATCACC GCATTACCATGATCGGTTCC | <i>Bam</i> HI      |
|                                            | Zm_psp_Rv        |                      | AAAGCTAGCTTACCCTGCATTGGGTCGAC                                 | <i>Nhe</i> I       |
| <i>Btchsy</i> cloning in pBEVY             | Btchsy_pBEVY_Fw  | pSP-GM1_Btchsy       | AACGCGGATCCAAAACAATGCATCACCATC<br>AC                          | <i>Bam</i> HI      |
|                                            | Btchsy_pBEVY_Rv  |                      | AACGCCGTCGACTTAAGCCGTGCGGACTGA<br>GC                          | <i>Sal</i> I       |
| <i>kfoA</i> cloning in pSP-GM1_Zmugd       | kfoA_psp_Fw      | pETM6_kfoCA          | ATTTGCGGCCGCAAAACAATGAATATATTA<br>GTTACAGGTG                  | <i>Not</i> I       |
|                                            | kfoA_psp_Rv      |                      | AACGAGCTCTTAAATATAACCATTG GGGTTT                              | <i>Sac</i> I       |
| <i>kfoC</i> cloning in pBEVY-L             | kfoC_pBEVY_Fw    | pETM6_kfoCA          | AACGCGGATCCAAAACAATGAGTATTCTTA<br>ATCAAGC                     | <i>Bam</i> HI      |
|                                            | kfoC_pBEVY_Rv    |                      | AACGCCGTCGACTTATAAATCATTCTCTATT<br>TTTTCCC                    | <i>Sal</i> I       |
| Colony PCR and sequencing                  |                  |                      |                                                               |                    |
|                                            | tADH1_Fw         | pSP-GM1_tefp_Giuae   | CCTAAGAGTCACTTTAAAATTTGT                                      |                    |
|                                            | TEF1p_Rv         | / pSP-GM1_Zmugd_kfoA | CGTACCACTTCAAAACACC                                           |                    |
|                                            | PGK1p_FW         | pSP-GM1_Zmugd /      | GTGATCTCCAGAGCAAAGT                                           |                    |
|                                            | CYCt_REV         | pSP-GM1_Giuae_Zmugd  | CTTCGAGCGTCCCAAAC                                             |                    |
|                                            | tADH1_Fw         | pBEVY_Btchsy /       | CCTAAGAGTCACTTTAAAATTTGT                                      |                    |
|                                            | pGAL_middle_Rv   | pBEVY_kfoC           | ATTATTCCTACTTGACTAATAAG                                       |                    |
|                                            | Bt_chsy1_mid dle | pBEVY_Btchsy         | CGGTAAATGTTTAAGAGAGATG                                        |                    |
|                                            | kfoC_pBEVY_Rv    | pBEVY_kfoC           | AACGCCGTCGACTTATAAATCATTCTCTATT<br>TTTTCCC                    |                    |

**Table S2.** Codon-optimized gene sequences (5' → 3') for *Saccharomyces cerevisiae*.

**>Chondroitin synthase (chsy1) (2412 bp GC%: 41,54; CAI: 0,74)**

```

ATGGCTGTCCGAGGTCTGAAGAGCATGGTTAAGCGTTTTGCTGGGTTTAGTTCTTGTTT
TGTCTTAGCCTCTAGACTCGTTTTGCCGAGGGCTTCTGAGTTAAAAAGAGCAGGCCCA
CGGAGAAGAGCTAGTCCAGAGGCTTGTAGGCCGGGTACAGGCAGCAGCCGTACCATT
AGCTGGAGGTGCTAGAGGAGATGCGAGAGGCCAAAGATTATGGCCCCACGGGGAAG
CTCAAGACGGTGTTCCTCCGCGACCGCAATTTCTTATTCGTAGGAGTCATGACCGCTCA
AAAGTATCTACAAACGAGAGCTGTGGCTGCTTTCAGAACTTGGTCAAAAACCTATCCC
AGGCAAGGTCTGAATTTTCTCATCTGAAGGTTCTGATACCAGTATTAGTATTCCTGTG
GTCCCATTTGCGAGGTGTTGATGATTCATATCCGCCTCAGAAAAAATCATTATGATGT
TAAAATATATGCATGATCATTACTTGGATAAGTACGAATGGTTCATGAGAGCTGACG
ATGATGTTTATATTAAGGTGACAGATTGGAATCATTCTTAAGATCGCTCAACAGCAG
CGAGCCTTTGTTCTTGGGACAGACCGGCTTAGGAACCACTGAAGAAATGGGAAAAC
TGCTCTAGAACCCGGTGAAAACTTTGCATGGGAGGCCCGGGCGTTATTATGAGCAG
AGAAGTATTGAGAAGAATGGTACCTCACATCGGTAAATGTTTAAGAGAGATGTACAC
TACTCACGAGGATGTAGAGGTGGGTCGCTGCGTTAGAAGATTTGCTGGTGTACAATG
CGTCTGGTCGTACGAAATGCAACAACCTCTTTATGAAAATTATGAACAAAATAAAAA
AGGTTACATACGTGATTTACACAATTCCAAGATACATAGAGCCATCACCTTACATCCT
AACAAAAATCCTCCATATCAATATCGTTTGCACAGCTATATGCTTTCTAGAAAAATCG
CTGAACCTGAGACATCGTACTATCCAACCTGCATCGCGAGATTGTCCTTATGTCCAAGTA
CAGTAATACGGAAGTTCATAAAGAGGATTTGCAATTAGGTATTCCACCGTCTTTCATG
AGATTTCAACCAAGACAAAGAGAAGAAATTTTGGAATGGGAATTTCTAACCGGTAA
GTATTTATATAGTGCAGCCGATAGCCAGCCCCACGTAGAGGTATGGACAGCGCCCA
AAGAGAAGCATTGGATGATATTGTTATGCAAGTTATGGAAATGATAAATGCCAATGC
CAAACTAGAGGGAGAATTATAGATTTCAAAGAAATTCAATACGGTTATCGCCGTGT
TAATCCGATGTACGGGGCTGAATATATACTGGATTTGTTGTTGCTTTACAAGAAACAT
AAAGGTAAGAAAATGACAGTTCAGTTAGAAGACATGCCTATTTGCAACAACTTTT
TCAAAAATTCAGTTTGTGTAACATGAAGAACTTGATGCAAAGGAATTGGCGAATAAA
ATTAATCAAGAATCCGGCTCCCTGTCTTCTGTCCAATTCATTGAAAAAGTTGGTGC
CATTTCAACTTCCCGGGAGTAAAAACGAACACAAAGAACCTAAGGAGAAAAAGATT
AATATTTTAATCCCCCTGAGCGGAAGATTTGACATGTTTGTCCGTTTCATGGGAACT
TTGAAAAGACATGTTTAATTCCGAATCAAAACGTGAAACTGGTTGTCTTATTGTTTAA
TTCTGATTCGAACCCTGACAAAGCCAAGCAAGTGGAACCTATGCGTGATTACAGAAT
TAAATATCCCAAGGCCGATATGCAAATTTTGCCGGTGTGAGGTGAGTTTTCCAGAGCC
TTGGCATTGGAGGTGGGCAGTTCTCAATTTAACAATGAGAGTCTTTTGTTTTCTGTGA
TGTTGACTTAGTCTTCACGGCCGAGTTTTTGCAACGTTGTAGAGCTAACACTGTCTTAG
GCCAACAAATTTACTTCCCTATTATCTTCTCACAATATGATCCTAAAATTGTCTACTCC
GGCAAAGTTCCAAGTGATAATCACTTTGCTTTTACTCAGAAAACTGGTTTTTGGAGGA
ATTATGGATTTGGAATTACGTGTATATACAAAGGGGATTTAGTGAGGGTGGGTGGCTT
TGATGTGTCCATCCAGGGTTGGGGTCTGGAAGATGTGCGATTTATTCAACAAAGTCGTT
CAAGCAGGGCTTAAACTTTTCAGGAGCCAGGAAGTTGGCGTGGTCCACGTACACCAT
CCTGTTTTTTGTGATCCGAACCTAGATCCTAAGCAATACAAAATGTGTTTGGGCAGTA
AAGCCTCCACTTATGGTAGCACTCATCAATTGGCAGAAATGTGGTTAGAAAAAACG
ATCCCAATTACTCTAAGTCGAGTAACAACAACGGCTCAGTCCGCACGGCTTAA

```

>UDP-N-acetylglucosamine 4-epimerase (UAE) (1158 bp GC%: 42,31; CAI: 0,77)

```
ATGCAGAATCATTCTTCTTGGGTAAAACGGTCTTGATCACAGGCGGTTGTGGTTTCA
TTGGATCTCATTTTGTAGAGGCTTGTCATGTTCTCGGTATGACCGTCTATGTTTTAGAT
AACCTCAGTTCTGGTAAGAATGTATTTAAGACAACATCTGATTGTTCTTCATCATTGGT
TTAACTATCGGTGACATTAGAGACAAGGCTATCTTCTCTAGACTTCCGCAGAAAATT
GACTTCGTCATTCATTTGGCCGCAGCTGTTTCTGTTGCCGAATCAGTAACAAATCCGC
AGAAATATATGTTAACCAATGTTGAGGGTAGTAGAAACGTTTTCCAGTATGCTGTTGA
CGCAAAGGCTTCAGCCGTCTTAAGTGCTTCTACTGCTGCATATTACGGCGATTGTGGT
AAGTCAGCTATTACCGAGGCTTTCCCCTATGGTGGCATTCTCCATACGCTGAAAGTA
AGATGGAGATGGAGAGATTAGGAGCCGAATTTCAAAAAGACATCTCGTTGCAGATTCA
TTTTCTGCAGATTTTTCAATGTCTACGGCCCTAGACAGGACCCCTCCTCGCCCTACACT
GGAGTTATGAGTATTTTTATGGACAGGTGCGCCGCTAGAAAACCGATTACAATCTTTG
GTACCGGCGAGCAAACAAGAGATTTTGTTCATCAAGGACTTAATTGTCGCTGCCAT
TAACTTATTAGGTCAATTGGATAAGTTTCCTATTGGAGCAGATGCCGTGCAACAGAAC
GATCCAGAAGAAGTCCAAAGGTCCGCATATACCGGTGAAGGTGTGTACCCAACTGTT
TTCAACATCGGATCGGGAATTTGATCAGTGTCAATGAGCTTGCTGAATTAGCCAAA
ATTGTTTCTGGTAGACATGAAGTGGAATTTGTTTCATGGAGAACCACGTAGTGGAGAC
ATATTGCATTCATTATCCGATTGCACTAGGATTAGAAACGCTACTGGATGGAGCGCAT
CTACTACTCTTAGAGTTGGTATGTCTGAAACTTGGGGATGGGCTGCTGGCGAAATTAG
TTACTTGTCTGGTGACTTGGTAAAGAGTGTGGAAAACGAATTAAAGATTGATGGGGTT
TCAGTAGCAAAATCTCTATGTGGTAAAGATGCAGATGTAAAAGGTATTGGATTATAG
```
